# Supplementary material
Source: publisher figshare collection journal article supplement (https://gsajournals.figshare.com/ndownloader/files/21385116)
Supplement: Supplementary file 1 [file 21385116]

## Sheet: ScHst1
ORF	gene	Klac ORF	MACS2 score	log2FC (mt/wt)	KlSir2 regulated	Bedalov hst1	McCord hst1	McCord sum1	Borde	Friedlander	category	subcategory	description
YDR380W	ARO10	KLLA0E02707g	2.73403	1.22641	2012	N	N	N	N	N	Metabolism	amino acid catabolism - Ehrlich pathway	Phenylpyruvate decarboxylase; catalyzes first specific step in the Ehrlich pathway; function overlaps with PDC6
YGR087C	PDC6	KLLA0E16303g	1.93936	1.96268	N	N	Y	Y	N	N	Metabolism	amino acid catabolism - Ehrlich pathway	Minor isoform of pyruvate decarboxylase; active on non-fermentable carbon sources; function overlaps with ARO10
YHL012W	YHL012W	KLLA0F25652g	2.68447	1.57824	N	N	N	N	Y	Y	Metabolism	carbon metabolism	UTP glucose-1-phosphate uridylyltransferase; produces UDP-glucose which is precursor of glycogen, galactose, glucuronic acid
YAR035W	YAT1	KLLA0C04169g	7.24208	1.85612	N	N	N	N	N	N	Metabolism	carbon metabolism - carnitine shuttle	Outer mitochondrial carnitine acetyltransferase; involved in transport of activated acyl groups from cytoplasm to mitochondrial matrix
YBR018C	GAL7	KLLA0F08437g	6.0069	1.554	N	N	N	N	Y	Y	Metabolism	carbon metabolism - galactose utilization	Galactose-1-phosphate uridyl transferase, second step of galactose catabolism
YCR005C	CIT2	KLLA0F12760g	2.46284	1.0198	2012	N	N	N	N	N	Metabolism	carbon metabolism - glyoxylate cycle	Citrate synthase, peroxisomal isozyme involved in glyoxylate cycle; catalyzes condensation of acetyl coA and oxaloacetate to form citrate
YFL011W	HXT10	KLLA0D13310g	6.83874	4.55561	N	Y	N	N	Y	Y	Metabolism	carbon metabolism - sugar transport	Putative hexose transporter; expressed at low levels and repressed by glucose
YFL040W	YFL040W	KLLA0D05379g	3.85722	1.70846	12&16	Y	N	Y	Y	Y	Metabolism	carbon metabolism - sugar transport	Putative transporter; member of the sugar porter family; may have role in sterol transport
YJL219W	HXT9	KLLA0D13310g	2.27577	1.83589	N	N	N	N	N	Y	Metabolism	carbon metabolism - sugar transport	Putative hexose transporter that is nearly identical to Hxt11p
YNL318C	HXT14	KLLA0E20945g	6.14008	8.08597	N	Y	N	Y	Y	Y	Metabolism	carbon metabolism - sugar transport	Putative hexose transporter; expression induced in low glucose and repressed in high glucose
YBL098W	BNA4	NA	3.67065	2.82857	N	Y	Y	Y	N	N	Metabolism	cofactor - NAD homeostasis	Kynurenine 3-monooxygenase; required for de novo biosynthesis of NAD from tryptophan
YFR047C	BNA6	NA	2.2031	1.03948	N	Y	N	N	N	N	Metabolism	cofactor - NAD homeostasis	Quinolinate phosphoribosyl transferase; required for de novo biosynthesis of NAD from tryptophan
YGR260W	TNA1	KLLA0A09449g	6.82114	2.50969	12&16	Y	Y	Y	N	N	Metabolism	cofactor - NAD homeostasis	High affinity nicotinic acid plasma membrane permease
YJR025C	BNA1	NA	7.92328	2.72977	N	Y	N	Y	N	N	Metabolism	cofactor - NAD homeostasis	3-hydroxyanthranilic acid dioxygenase; required for de novo biosynthesis of NAD from tryptophan
YJR078W	BNA2	NA	8.22511	3.30133	N	Y	Y	Y	N	N	Metabolism	cofactor - NAD homeostasis	Tryptophan 2,3-dioxygenase; required for de novo biosynthesis of NAD from tryptophan
YLR231C	BNA5	NA	4.86542	2.4037	N	Y	Y	Y	N	N	Metabolism	cofactor - NAD homeostasis	Kynureninase; required for de novo biosynthesis of NAD from tryptophan
YOR071C	NRT1	KLLA0D00550g	6.50648	1.59687	N	Y	Y	Y	N	N	Metabolism	cofactor - NAD homeostasis	High-affinity nicotinamide riboside transporter; also transports thiamine with low affinity
YMR095C	SNO1	KLLA0A00352g	2.28121	1.32845	2012	N	Y	Y	Y	N	Metabolism	cofactor - pyridoxine	Protein involved in pyridoxine (vitamin B6) biosynthesis; forms a glutamine amidotransferase complex with Snz1p
YMR096W	SNZ1	KLLA0A00374g	2.28121	2.36692	2012	N	Y	Y	Y	N	Metabolism	cofactor - pyridoxine	Protein involved in pyridoxine (vitamin B6) biosynthesis; interacts with Sno1p and Yhr198p
YGR144W	THI4	KLLA0A00198g	1.76146	2.57945	N	Y	N	Y	N	N	Metabolism	cofactor - thiamine	Thiazole synthase; forms thiazole moiety during thiamine biosynthesis; consumes NAD; provides sulphur source
YNL332W	THI12	KLLA0C19085g	3.71036	2.47416	N	Y	N	N	N	N	Metabolism	cofactor - thiamine	Hydroxymethylpyrimidine (HMP) synthase involved in thiamine biosynthesis; substrate is pyridoxal phosphate; member of subtelomeric gene family
YIR027C	DAL1	KLLA0C04301g	7.84754	2.05719	N	Y	N	Y	Y	N	Metabolism	nitrogen metabolism - allantoin	Allantoinase; converts allantoin to allantoate in first step of allantoin breakdown for nitrogen
YIR028W	DAL4	KLLA0D03454g	7.84754	1.51528	N	Y	N	Y	Y	N	Metabolism	nitrogen metabolism - allantoin	Allantoin permease; involved in allantoin transport and breakdown for nitrogen
YGR043C	NQM1	KLLA0A02607g	2.92789	1.23649	N	N	N	N	N	N	Metabolism	pentose phosphate pathway	Transaldolase; induced in low glucose; paralog TAL1 involved in pentose phosphate pathway
YGR256W	GND2	KLLA0A09339g	3.79664	1.43878	N	N	N	Y	N	N	Metabolism	pentose phosphate pathway	6-phosphogluconate dehydrogenase (decarboxylating); catalyzes an NADPH regenerating reaction in pentose phosphate pathway
YDL024C	DIA3	KLLA0C19338g/KLLA0E24949g/KLLA0A00176g/KLLA0B00286g/KLLA0D00258g	5.65269	1.29734	12&16	Y	N	N	Y	N	Metabolism	phosphate uptake	Putative acid phosphatase; localized to cell wall; involved in invasive and pseudohyphal growth
YOR237W	HES1	KLLA0D07480g	3.61641	2.56189	N	N	Y	Y	Y	Y	Metabolism	phospholipid homeostasis	Oxysterol binding protein implicated in regulation of ergosterol biosynthesis
YOR365C	YOR365C	KLLA0A03355g	6.83208	2.20581	N	Y	Y	Y	Y	Y	Metabolism	phospholipid homeostasis	TRP ion channel of unknown function; implicated in sphingolipid biosynthesis
YDR379C-A	SDH6	KLLA0E02619g	2.73403	1.24773	N	N	N	N	N	N	Metabolism	respiration	Mitochondrial protein involved in assembly of succinate dehydrogenase
YJL045W	YJL045W	KLLA0D04444g	2.90724	2.65956	N	Y	N	Y	N	Y	Metabolism	respiration	Minor succinate dehydrogenase isozyme; participates in oxidation of succinate and transfer of electrons to ubiquinone
YJR079W	YJR079W	NA	8.22511	1.86414	N	Y	N	Y	N	N	Metabolism	respiration	Putative protein of unknown function; mutation results in impaired mitochondrial respiration
YKR076W	ECM4	KLLA0F12056g	1.87456	1.19054	N	N	N	N	Y	N	Other	glutathione metabolism	S-glutathionyl-(chloro)hydroquinone reductase (GS-HQR); glutathione transferase involved in cell-surface biosynthesis and architecture
YHR176W	FMO1	KLLA0A09229g	1.65647	1.15151	N	N	N	N	N	N	Other	protein folding	Flavin-containing monooxygenase localized to cytoplasmic face of ER; maintains ER redox ratio for correct folding of disulfide-bonded proteins
YLR410W-B	YLR410W-B	NA	3.50587	1.28672	N	N	N	N	N	N	Other	retrotransposon	Retrotransposon TYA Gag and TYB Pol genes
YMR107W	SPG4	KLLA0B12650g	5.50242	2.04627	N	N	N	Y	Y	Y	Other	stationary phase protein	Protein required for high temperature survival during stationary phase
YLR233C	EST1	KLLA0F20702g	4.86542	1.84191	N	Y	N	N	N	N	Other	telomerase subunit	subunit of telomerase; TLC1 RNA-associated protein involved in telomere length regulation
YKL112W	ABF1	KLLA0F02970g	2.99056	1.10018	N	N	N	N	N	N	Other	transcription factor	DNA binding protein with possible chromatin-reorganizing activity
YKR034W	DAL80	KLLA0F21296g	5.86672	3.61804	N	N	Y	Y	Y	N	Other	transcription factor	DNA binding protein; Negative regulator of genes in multiple nitrogen degradation pathways
YBR147W	RTC2	KLLA0C03762g	4.72047	1.55143	N	N	N	N	Y	N	Other	transporter	Basic amino acid transporter of PQ-loop superfamily; exports cationic amino acids from vacuole
YOL163W	YOL163W	KLLA0F09405g/KLLA0D07370g	1.69269	1.26866	N	N	N	N	N	N	Other	transporter; inactive	proposed to be inactive evolutionary remnant that, along with neighboring gene YOL163W, constituted a second sulfonate transporter; member of Dal5 subfamily of major facilitator superfamily
YBR040W	FIG1	KLLA0B06864g	4.728	5.34033	N	Y	Y	Y	N	N	Sexual Cycle	mating - cell fusion	Integral membrane protein involved in membrane fusion during mating; may participate in low affinity Ca2+ influx system
YML047C	PRM6	KLLA0A08063g	2.82435	5.51954	N	Y	Y	Y	Y	N	Sexual Cycle	mating - cell fusion	Transporter that mediates K+ influx; activates high-affinity Ca2+ influx system (HACS) during mating pheromone response
YMR232W	FUS2	KLLA0B13068g	3.49585	2.70704	N	N	N	N	Y	N	Sexual Cycle	mating - cell fusion	Protein localized to shmoo tip and nucleus; required for cell fusion and alignment of parental nuclei before nuclear fusion during mating
YNL279W	PRM1	KLLA0C01936g	2.07059	1.32287	12&16	Y	N	Y	Y	N	Sexual Cycle	mating - cell fusion	Pheromone-regulated multispanning membrane protein; involved in membrane fusion during mating; localizes to shmoo tip
YIL037C	PRM2	KLLA0E04313g	3.34178	2.45421	N	N	Y	Y	Y	N	Sexual Cycle	mating - nuclear fusion	Pheromone-regulated protein; predicted to have 4 transmembrane segments and a coiled coil domain; required for nuclear fusion
YDL214C	PRR2	KLLA0D08415g	3.83739	1.45917	N	N	N	N	Y	N	Sexual Cycle	mating - signaling	Serine/threonine protein kinase; inhibits pheromone induced signalling downstream of MAPK
YBR250W	SPO23	KLLA0B10373g	2.112	2.45337	12&16	Y	N	N	Y	Y	Sexual Cycle	sporulation	Protein of unknown function; associates with meiosis-specific protein Spo1p
YFR023W	PES4	KLLA0A08338g	5.48241	4.22433	N	Y	Y	Y	Y	Y	Sexual Cycle	sporulation	Poly(A) binding protein, RRM motifs; contributes to spore wall formation
YHR015W	MIP6	KLLA0A08338g	6.29499	2.05026	N	Y	N	Y	Y	Y	Sexual Cycle	sporulation	RNA-binding protein, RRM motifs; interacts with Mex67, a component of the nuclear pore involved in nuclear mRNA export
YNL202W	SPS19	KLLA0D18909g	5.22307	1.73525	12&16	Y	N	Y	Y	N	Sexual Cycle	sporulation	Peroxisomal 2,4-dienoyl-CoA reductase; auxiliary enzyme of fatty acid beta-oxidation; induced during sporulation and in presence of oleate
YNL204C	SPS18	KLLA0D18942g	5.22307	2.24091	N	Y	N	Y	Y	N	Sexual Cycle	sporulation	Protein of unknown function, contains a putative zinc-binding domain; expressed during sporulation
YOR313C	SPS4	KLLA0F08679g	7.69613	2.16062	12&16	Y	N	Y	Y	Y	Sexual Cycle	sporulation	Protein whose expression is induced during sporulation
YER106W	MAM1	KLLA0E20637g	2.4066	4.87254	12&16	Y	Y	Y	Y	Y	Sexual Cycle	sporulation - meiosis	Monopolin; kinetochore associated protein involved in chromosome attachment to meiotic spindle; expressed during meiosis I
YFR032C	RRT5	KLLA0D16049g	6.94253	3.97456	N	Y	Y	Y	Y	Y	Sexual Cycle	sporulation - spore membrane	Putative protein of unknown function; expressed at high levels during sporulation; localizes to prospore membrane
YGL138C	YGL138C	KLLA0B01936g	7.87174	6.68213	12&16	Y	Y	Y	Y	N	Sexual Cycle	sporulation - spore membrane	Putative protein of unknown function; associated with prospore membrane
YHR184W	SSP1	KLLA0A09361g	4.80226	1.73673	12&16	Y	N	Y	Y	Y	Sexual Cycle	sporulation - spore membrane	subunit of leading edge protein complex that forms ring-like structure at leading edge of the prospore membrane
YHR185C	PFS1	KLLA0A09405g	6.47905	6.11358	12&16	Y	Y	Y	Y	Y	Sexual Cycle	sporulation - spore membrane	Sporulation protein required for prospore membrane formation at spindle poles
YML066C	SMA2	KLLA0B04972g	2.33407	1.8289	N	Y	N	N	Y	Y	Sexual Cycle	sporulation - spore membrane	Prospore membrane protein required to produce bending force necessary for assembly of the prospore membrane
YMR017W	SPO20	NA	1.909	1.64963	N	Y	N	N	Y	Y	Sexual Cycle	sporulation - spore membrane	Meiosis-specific subunit of the t-SNARE complex; required for prospore membrane formation during sporulation
YOL015W	IRC10	NA	2.25784	1.51519	N	N	N	N	Y	Y	Sexual Cycle	sporulation - spore membrane	subunit of leading edge protein complex on prospore membrane
YPL027W	SMA1	NA	2.29202	4.96622	N	Y	N	N	Y	Y	Sexual Cycle	sporulation - spore membrane	Protein of unknown function involved in prospore membrane assembly; interacts with Spo14p
YPL130W	SPO19	NA	4.65373	4.83645	N	Y	N	Y	Y	Y	Sexual Cycle	sporulation - spore membrane	Prospore protein required to produce bending force necessary for proper assembly of the prospore membrane
YBR148W	YSW1	KLLA0C03784g	4.72047	3.64006	N	Y	N	Y	Y	N	Sexual Cycle	sporulation - spore membrane septin complex	Protein required for prospore membrane formation; interacts with Gip1p; localizes to the prospore membrane
YDR218C	SPR28	KLLA0F13112g	2.69818	4.38782	N	Y	Y	Y	Y	Y	Sexual Cycle	sporulation - spore membrane septin complex	Septin protein involved in sporulation, localizes to prospore wall
YGR059W	SPR3	KLLA0B08129g	4.89608	4.9207	12&16	Y	Y	Y	Y	Y	Sexual Cycle	sporulation - spore membrane septin complex	Septin protein involved in sporulation, localizes to prospore wall
YGL170C	SPO74	KLLA0D02068g	7.18311	3.29052	12&16	Y	Y	Y	Y	Y	Sexual Cycle	sporulation - spore membrane spindle-pole body	Component of the meiotic outer plaque of spindle pole body; involved in prospore membrane formation
YOL091W	SPO21	KLLA0C03784g	1.90605	2.73759	N	Y	N	Y	Y	Y	Sexual Cycle	sporulation - spore membrane spindle-pole body	Component of the meiotic outer plaque of spindle pole body; involved in prospore membrane formation
YOR177C	MPC54	NA	2.17834	1.34861	N	N	N	N	Y	N	Sexual Cycle	sporulation - spore membrane spindle-pole body	Component of meiotic outer plaque, a prospore membrane-organizing center assembled on cytoplasmic face of spindle pole body
YAL018C	LDS1	KLLA0F07601g	5.70831	6.34211	12&16	Y	Y	Y	Y	Y	Sexual Cycle	sporulation - spore wall	Involved in spore wall assembly; localizes to lipid droplets near prospore membrane
YBR045C	GIP1	KLLA0A10571g	4.37188	3.55753	12&16	Y	Y	Y	Y	Y	Sexual Cycle	sporulation - spore wall	Meiosis-specific regulatory subunit of Glc7 protein phosphatase; regulates spore wall formation, septin organization, and late meiotic gene expression
YBR076W	ECM8	NA	4.96266	1.23787	N	N	N	N	Y	N	Sexual Cycle	sporulation - spore wall	Protein of unknown function, may be associated with cell wall, has DUF4451 found in fungal meiotic proteins
YBR180W	DTR1	KLLA0E24113g	5.46805	3.60534	2012	Y	Y	Y	Y	Y	Sexual Cycle	sporulation - spore wall	Putative dityrosine transporter of major facilitator superfamily; required for spore wall synthesis
YCL048W	SPS22	KLLA0C01001g	7.81461	3.46719	N	Y	N	Y	Y	Y	Sexual Cycle	sporulation - spore wall	Protein of unknown function; redundant with Sps2p for organization of the beta-glucan layer of the spore wall
YDR403W	DIT1	KLLA0C06765g	4.1339	1.46754	12&16	Y	N	N	Y	N	Sexual Cycle	sporulation - spore wall	Enzyme that produces soluble LL-dityrosine-containing precursor of spore wall
YDR522C	SPS2	KLLA0C01001g	6.81608	2.38644	N	Y	Y	Y	Y	Y	Sexual Cycle	sporulation - spore wall	Protein expressed during sporulation; redundant with Sps22p for organization of the beta-glucan layer of the spore wall
YDR523C	SPS1	KLLA0C00979g	6.81608	4.64877	12&16	Y	Y	Y	Y	Y	Sexual Cycle	sporulation - spore wall	Putative serine/threonine kinase required for efficient spore packaging, prospore membrane closure, and localization of spore wall synthesis enzymes
YGR032W	GSC2	KLLA0B05841g	2.29401	1.0867	N	Y	N	N	Y	N	Sexual Cycle	sporulation - spore wall	Catalytic subunit of 1,3-beta-glucan synthase; uses UDP-glucose to form inner layer of spore wall
YJL037W	IRC18	NA	3.23319	4.04634	N	Y	Y	Y	Y	Y	Sexual Cycle	sporulation - spore wall	Protein involved in outer spore wall assembly; likely involved directly in dityrosine layer assembly
YJL038C	LOH1	NA	3.23319	2.91859	N	Y	Y	Y	Y	Y	Sexual Cycle	sporulation - spore wall	Protein involved in outer spore wall assembly; likely involved directly in dityrosine layer assembly
YLL005C	SPO75	KLLA0F15807g	6.48552	2.17834	N	Y	Y	Y	Y	N	Sexual Cycle	sporulation - spore wall	Meiosis-specific protein of unknown function; required for spore wall formation
YLR213C	CRR1	KLLA0F04906g	2.37075	2.03913	12&16	Y	N	Y	Y	Y	Sexual Cycle	sporulation - spore wall	Putative glycoside hydrolase required for spore wall assembly, possibly for cross-linking glucan and chitosan layers
YLR307W	CDA1	KLLA0C17226g	3.42088	5.4786	12&16	Y	Y	Y	Y	Y	Sexual Cycle	sporulation - spore wall	Chitin deacetylase; involved in biosynthesis of ascospore wall component chitosan
YLR308W	CDA2	KLLA0C17226g	6.86949	7.98799	12&16	Y	Y	Y	Y	N	Sexual Cycle	sporulation - spore wall	Chitin deacetylase; involved in biosynthesis of ascospore wall component chitosan
YLR341W	SPO77	KLLA0B05885g	3.41604	1.27679	12&16	Y	N	Y	Y	Y	Sexual Cycle	sporulation - spore wall	Meiosis-specific protein required for spore wall formation and prospore membrane closure
YLR343W	GAS2	KLLA0B05808g	7.52519	3.24968	N	Y	N	Y	Y	Y	Sexual Cycle	sporulation - spore wall	1,3-beta-glucanosyltransferase; involved in spore wall assembly
YOL047C	LDS2	NA	1.73277	2.20378	N	Y	Y	Y	Y	N	Sexual Cycle	sporulation - spore wall	Involved in spore wall assembly; localizes to lipid droplets found near prospore membrane
YOR214C	SPR2	NA	8.2385	6.109	N	Y	Y	Y	Y	Y	Sexual Cycle	sporulation - spore wall	Putative spore wall protein; expression increases during sporulation
YOR255W	OSW1	KLLA0C09779g	6.51197	6.06249	N	Y	Y	Y	Y	Y	Sexual Cycle	sporulation - spore wall	Protein involved in sporulation; required for the construction of the outer spore wall layers
YOR298W	MUM3	KLLA0F25058g	2.63408	1.97721	12&16	Y	Y	Y	Y	N	Sexual Cycle	sporulation - spore wall	Protein involved in outer spore wall organization; similarity to tafazzin superfamily of acyltransferases
YOL083W	ATG34	NA	3.09673	1.29973	N	N	N	N	N	N	Starvation Response	autophagy	Receptor protein involved in selective autophagy during starvation; specifically involved in transport of cargo protein Ams1p
YCL026C-A	FRM2	KLLA0C01562g	2.01233	4.42119	12&16	Y	N	N	N	N	Stress Response	oxidative stress	Type II nitroreductase, uses NADH as reductant; involved in the oxidative stress response and lipid signaling
YAL037W	YAL037W	KLLA0F23309g	2.03976	1.13602	N	N	N	N	Y	N	Unknown	conserved protein	Putative protein of unknown function
YCL048W-A	YCL048W-A	KLLA0C00957g	7.81461	1.51419	N	N	N	N	N	N	Unknown	conserved protein	Putative membrane protein of unknown function; localizes to cell periphery and vacuole
YDL114W	YDL114W	KLLA0E09153g	6.70831	6.09039	12&16	Y	Y	Y	Y	Y	Unknown	conserved protein	Putative short-chain dehydrogenase/reductase
YEL023C	YEL023C	KLLA0E22595g	2.44263	1.74647	12&16	N	N	Y	N	Y	Unknown	conserved protein	Putative protein of unknown function; expression is increased greatly during sporulation
YER187W	YER187W	KLLA0A12045g/KLLA0C19327g	5.88891	2.14364	N	Y	Y	Y	N	N	Unknown	conserved protein	Putative protein of unknown function; induced in respiratory-deficient cells; proposed to be evolutionary remnant along with neighboring gene YER186W-A
YGL146C	RRT6	KLLA0E09241g	3.28632	1.15148	N	N	N	N	N	N	Unknown	conserved protein	Putative protein of unknown function; may be involved in regulation of rDNA transcription
YHR126C	ANS1	KLLA0A11748g	3.4903	7.35672	12&16	Y	Y	Y	N	N	Unknown	conserved protein	Putative GPI protein; localized to vacuole
YJL043W	YJL043W	NA	5.93303	3.05108	N	Y	N	Y	Y	Y	Unknown	conserved protein	Putative protein of unknown function
YJL133C-A	DPI8	KLLA0A05566g	2.37811	1.55919	N	N	N	N	N	N	Unknown	conserved protein	Putative protein of unknown function; localizes to mitochondrion
YLR307C-A	DPA10	KLLA0C17237g	6.86949	2.94599	N	N	N	N	N	N	Unknown	conserved protein	Putative protein of unknown function, small gene between CDA1 and CDA2
YLR460C	YLR460C	KLLA0F24464g	2.15473	1.37144	12&16	N	N	N	N	N	Unknown	conserved protein	Quinone oxidoreductase of medium-chain dehydrogenase/reducatse (MDR) family
YMR244W	YMR244W	KLLA0F08745g	5.70783	4.80587	12&16	Y	Y	Y	N	N	Unknown	conserved protein	SUN family protein of unknown function; localized to vacuole
YPL033C	SRL4	KLLA0F07271g	2.75698	5.94126	12&16	Y	Y	Y	Y	N	Unknown	conserved protein	Putative short chain dehydrogenase; may be involved in regulation of dNTP production
YPL272C	PBI1	NA	2.57441	1.73558	N	Y	N	Y	N	N	Unknown	conserved protein	Putative alcohol acetyltransferase
YPR078C	YPR078C	NA	4.54364	1.30844	N	N	Y	Y	Y	Y	Unknown	conserved protein	Putative protein of unknown function; possible role in DNA metabolism and/or genome stability
YHR054C	YHR054C	NA	1.75957	5.171	N	Y	Y	Y	N	N	Unknown	duplicated fragment	Putative protein of unknown function; partial duplicate of RSC30/YHR056C, truncated remnant of segmental duplication
YBR200W-A	YBR200W-A	NA	1.76801	7.03974	N	N	N	N	N	N	Unknown	poorly conserved	Putative protein of unknown function; 54 aa long; identified by fungal homology and RT-PCR; no BLAST hits
YDL007C-A	YDL007C-A	NA	1.94585	6.43916	N	N	N	N	N	N	Unknown	poorly conserved	Putative protein of unknown function; no BLAST hits outside sensu stricto
YDR042C	YDR042C	NA	1.99684	2.84331	N	Y	N	Y	Y	Y	Unknown	poorly conserved	Putative protein of unknown function; no BLAST hits outside sensu stricto
YEL057C	SDD1	NA	2.1134	1.31391	N	N	N	N	Y	N	Unknown	poorly conserved	Protein of unknown function; may have a role in telomere maintenance; no BLAST hits outside sensu stricto
YFR012W-A	YFR012W-A	NA	2.23011	3.62938	N	N	N	N	N	N	Unknown	poorly conserved	Putative protein of unknown function; 28 aa long; no BLAST hits outside sensu stricto
YGL015C	YGL015C	NA	4.80226	3.58961	N	Y	Y	Y	Y	Y	Unknown	poorly conserved	Putative protein of unknown function; localizes to prospore membrane; null mutants accumulate cargo in Golgi; no BLAST hits outside sensu stricto
YGR050C	YGR050C	NA	2.54882	1.09675	N	N	N	N	N	N	Unknown	poorly conserved	Protein of unknown function; no BLAST hits in other species
YNL018C	YNL018C	NA	3.13033	1.03809	N	Y	N	N	Y	Y	Unknown	poorly conserved	Putative protein of unknown function; localizes to prospore membrane; no BLAST hits outside sensu stricto
